# Supplementary material
Source: publisher site journal article supplement (https://arthropod-systematics.arphahub.com/article/87378/download/suppl/31/)
Supplement: Supplementary file 1

## Sheet: Planilha1
Table S1. Taxonomic overview of the representatives of Belostoma plebejum group.
	Lauck (1962)				Nieser (1975)				Estévez and Polhemus (2007)
Group	Belostoma plebejum*	B. pygmeum				B. plebejum**				B. plebejum**
Described species	B. micantulum (Stål, 1860), B. minusculum (Uhler, 1884) and B. plebejum (Stål, 1860)	B. lariversi De Carlo, 1960 and B. pygmeum (Dufour, 1863)				B. micantulum, B. minusculum and B. plebejum + B. lariversi + B. pygmeum				B. lariversi, B. micantulum, B. minusculum, B. plebejum and B. pygmeum + B. nicaeum Estévez and Polhemus (2007) + B. parvum Estévez and Polhemus (2007)
Diagnostic characteristics	Ventral diverticulum of phallosoma with an apical protuberance	Dorsolateral margins of ventral diverticulum conspicuously thickened				Phallus strongly curved ventrally				Prosternal carina prominent and rounded + phallus strongly curved ventrally
*Belostoma plebejum s.s.
**Belostoma plebejum s.l.: a group comprising representatives of the old group formed by species of B. plebejum and B. pygmeum groups.
“+” before species names indicates the addition of new elements in a group erected by the authors.

## Sheet: Planilha2
Table S2. Studied species for the phylogenetic analysis of the Belostoma plebejum group sensu Nieser (1975).
Taxa / Gender	Depositoriesa	Localities
Belostoma plebejum group sensu Nieser (ingroup)
Belostoma estevezae Ribeiro & Alecrim, 2008
2 males – 1 female	AMNH – DZRJ	BRAZIL: Mato Grosso — Porto Velho, Santa Terezinha, Rio Tapirapé
1 male	LEBIP 505	BRAZIL: Rio Grande do Sul — São Gabriel, campus da UNIPAMPA
Belostoma lariversi De Carlo, 1960 (v1)
2 males – 5 females	SEMC 3796	BRAZIL: Amazonas — Eirunepé (=São Felipe), [“Vic. João Pessoa”], Rio Juruá
1 female	AMNH	BRAZIL: Minas Gerais — Pirapora
1 female	AMNH	BRAZIL: Mato Grosso — Porto Velho, Santa Terezinha, Rio Tapirapé
Belostoma lariversi De Carlo, 1960 (v2)
2 males	SEMC 3796	BRAZIL. Amazonas — Eirunepé (=São Felipe), [“Vic. João Pessoa”], Rio Juruá
Belostoma micantulum (Stål, 1860) (v1)
1 male	AMNH	BRASIL. Pará — Belém, Rio Guamá
1 female	INPA 0020953	BRAZIL: Amazonas — médio Purus
1 male	INPA 0020954	BRAZIL: Amazonas — médio Purus
1 male – 1 female	DZRJ	BRAZIL: Paraíba — Mamanguape
1 male	DZRJ	BRAZIL: Paraíba — João Pessoa
1 male	AMNH	BRAZIL: Mato Grosso — Sinop
1 male – 1 female	MNRJ	BRAZIL: Espírito Santo — Barra de São Francisco, Córrego [do] Itá
1 female	MNRJ	BRAZIL: Espírito Santo — Barra de São Francisco, Córrego [do] Itá
1 male	MNRJ	BRAZIL: Espírito Santo — Linhares, Parque Sooretama
1 male	DZRJ 26	BRAZIL: Rio de Janeiro — Macaé
Belostoma micantulum (Stål, 1860) (v2)
1 male	AMNH	BRAZIL: Pará — Jacareacanga
1 female	INPA 0021026	BRAZIL: Amazonas
1 female	INPA 0020880	BRAZIL: Amazonas — Parque Nacional do Jaú, Igarapé Miratuca
1 male	INPA 0020881	BRAZIL: Amazonas — Parque Nacional do Jaú, Igarapé Miratuca
1 female	INPA 0020882	BRAZIL: Amazonas — Parque Nacional do Jaú, Igarapé Miratuca
1 male	INPA 0020883	BRAZIL: Amazonas — Parque Nacional do Jaú, Igarapé Miratuca
1 female	MNRJ	BRAZIL: Espírito Santo — Barra de São Francisco, Córrego [do] Itá.
Belostoma minusculum (Uhler, 1884) (v1)
2 males	SEMC	BRAZIL: Pará
1 male	SEMC	BRAZIL: Pará — Obidos [as Obydos]
1 female	INPA 0020890	BRAZIL: Amazonas —Manaus, Lago do Catalão
1 male	INPA 0021025	BRAZIL: Amazonas —Manaus, km 45
1 female	DZRJ 664	BRAZIL: Amazonas — Rio Negro, Arquipélago de Anavilhanas, Lago Xidaua
1 female	AMNH	BRAZIL: Mato Grosso — Porto Velho, Santa Terezinha, Rio Tapirapé
1 male	AMNH	BRAZIL: Minas Gerais — Pirapora
Belostoma minusculum (Uhler, 1884) (v2)
1 male	AMNH	BRAZIL: Mato Grosso — Porto Velho, Rio Tapirapé
1 male	AMNH	BRAZIL: Minas Gerais — Pirapora
Belostoma nessimiani Ribeiro & Alecrim, 2008
1 male*	INPA	BRAZIL: Pará — Almeirim, Paranaquara, Paraná
2 males** – 1 female**	DZRJ	BRAZIL: Pará — Juruti, Recreio, Paraná
1 male **	INPA	BRAZIL: Pará — Almeirim, Paranaquara, Paraná
1 male** – 1 female**	INPA	BRAZIL: Amazonas — Urucará, Lírio do Vale, Lago do Albano
1 female	LEBIP 507	BRAZIL: Rio Grande do Sul — São Gabriel, campus da UNIPAMPA
Belostoma nicaeum Estévez & Polhemus, 2007 (v1)
1 male – 1 female	DZRJ 511	BRAZIL: Amazonas — Ilha de Marchantaria, Rio Solimões, Lago do Janauari
1 female	INPA 0020963	BRAZIL: Amazonas — Ilha de Marchantaria, Rio Solimões, Lago do Janauari
1 female	INPA 0020879	BRAZIL: Amazonas — Itacoatiara, Fazenda Aruanã AM-010, km 215
1 female	INPA 0020960	BRAZIL: Amazonas — Manaquiri, Lago Janauacá
2 males** – 1 female**	SEMC	BRAZIL: Amazonas — Manaus, Rio Negro
1 female	DZRJ 663	BRAZIL: Bahia — Conde
1 male	AMNH	BRAZIL: Mato Grosso — Porto Velho, Santa Terezinha, Rio Tapirapé
1 female	AMNH	BRAZIL: Mato Grosso — Porto Velho, Santa Terezinha, Rio Tapirapé
1 female	DZRJ 28	BRAZIL: Mato Grosso do Sul — Corumbá, Popular Nova
Belostoma nicaeum Estévez & Polhemus, 2007 (v2)
1 female	INPA 0021056	BRAZIL: Amazonas — Manaus
1 male	DZRJ 29	BRAZIL: Mato Grosso do Sul — Corumbá, Popular Nova
Belostoma parvum Estévez & Polhemus, 2007
3 males – 1 female	AMNH	BRAZIL: Pará — Belém, Rio Guamá
1 male	INPA 0020892	BRAZIL: Amazonas — Rio Madeira, Rio Tupana
1 male	INPA 0020889	BRAZIL: Amazonas — Alvarães, Rio Solimões, Igarapé Grande
Belostoma plebejum (Stål, 1860)
1 female	AMNH	BRAZIL: Pará — Jacareacanga
1 female	DZRJ	BRAZIL: Paraíba — Lucena, Fazenda [Vale] Mangereba
1 male – 1 female	DZRJ	BRAZIL: Paraíba — Itaporoca, Rio Mamanguape Santíssimo
2 males – 1 female	AMNH	BRAZIL: Bahia — Encruzilhada [960 m]
1 male	MNRJ 189	BRAZIL: Minas Gerais — Além Paraíba
1 male – 1 female	MNRJ 129	BRAZIL: Minas Gerais — Morada Nova de Minas, Barra de Paraopeba
2 males	MNRJ	BRAZIL: Espírito Santo — Barra de São Francisco, Córrego [do] Itá
1 male	MNRJ	BRAZIL: Espírito Santo — Linhares, Parque Sooretama
2 males	MNRJ	BRAZIL: Espírito Santo — Linhares, Parque Sooretama
1 male	MNRJ 36	BRAZIL: Espírito Santo — Linhares, Parque Sooretama
1 female	MNRJ 130 [163]	BRAZIL: Espírito Santo — Linhares, Parque Sooretama
1 female	MNRJ	BRAZIL: Rio de Janeiro — Seropédica, Estrada Rio-São Paulo [km 47]
1 male	MNRJ	BRAZIL: Rio de Janeiro — Seropédica, Estrada Rio-São Paulo [km 47]
1 male	MNRJ 131	BRAZIL: Rio de Janeiro — Seropédica, Estrada Rio-São Paulo [km 47]
1 male	MNRJ 133	BRAZIL: Rio de Janeiro — Seropédica, Estrada Rio-São Paulo [km 47]
1 male	MNRJ 134	BRAZIL: Rio de Janeiro — Seropédica, Estrada Rio-São Paulo [km 47]
3 males – 1 female	MNRJ 135	BRAZIL: Rio de Janeiro — Seropédica, Estrada Rio-São Paulo [km 47]
1 male	MNRJ 137	BRAZIL: Rio de Janeiro — Seropédica, Estrada Rio-São Paulo [km 47]
1 male	DZRJ 39	BRAZIL: Rio de Janeiro — Maricá, Restinga de Maricá
1 female	MNRJ 132	BRAZIL: Rio de Janeiro — Araruama, Lagoa Juturnaíba
1 male	DZRJ 472	BRAZIL: Rio Grande do Sul — Dom Pedrito, Bacia do Rio Uruguai. 4 km SE
Belostoma pygmeum (Dufour, 1863) (v1)
1 female	INPA 0020962	BRAZIL: Pará — Ilha de Marajó
1 male	SEMC	BRAZIL: Pará — Obydos [Obidos]
1 female	SEMC	BRAZIL: Pará — Santarém
1 male – 1 female	DZRJ 1153	BRAZIL: Amazonas — Ilha de Marchantaria, Rio Solimões, Lago Janauari
1 male	INPA 0021057	BRAZIL: Amazonas — Manaus
2 males – 1 female	AMNH	BRAZIL: Bahia — Encruzilhada [960 m]
1 female	INPA 0020943	BRAZIL: Mato Grosso — Bodoquena
1 female	DPIC	BRAZIL: Mato Grosso — “Poconé – IBDF Transp.”
1 male	MNRJ	BRAZIL: Mato Grosso — [Nova] Xavantina
1 female	DZRJ 27	BRAZIL: Mato Grosso do Sul — Corumbá, Popular Nova
1 male	MNRJ	BRAZIL: Mato Grosso do Sul — Miranda, Salobra
1 male	SEMC 288a	BRAZIL: São Paulo — Araçá[tuba]
Belostoma pygmeum (Dufour, 1863) (v2)
1 male	SEMC	BRAZIL: Pará — Obydos [Obidos]
1 female	INPA 0020961	BRAZIL: Amazonas — Ilha de Marchantaria
1 female	DZRJ 30	BRAZIL: Mato Grosso do Sul — Corumbá, Popular Nova
1 male	MNRJ 190	BRAZIL: Mato Grosso do Sul — Miranda, Salobra
1 male	MNRJ 191	BRAZIL: Mato Grosso do Sul — Miranda, Salobra
1 male	MNRJ 192	BRAZIL: Mato Grosso do Sul — Miranda, Salobra
Belostoma oxyurum group sensu Lauck (outgroups)
Belostoma candidulum Montandon, 1903 (v1)
1 female	MNRJ 125	BRAZIL: Goiás — Rio Verde
1 female	MNRJ 161	BRAZIL: Minas Gerais — C. [?] Rio Claro
1 male	MNRJ 168	BRAZIL: Minas Gerais — Barra de Paraopeba
1 female	DZRJ 546	BRAZIL: Minas Gerais — Viçosa, Universidade Federal de Viçosa (UFV)
1 female	DZRJ 506	BRAZIL: Minas Gerais — 54 km NO de Campina Verde, Bacia do Rio Paraná
1 male	DZRJ 41	BRAZIL: Rio de Janeiro — Maricá, Restinga de Maricá
1 male – 3 females	DZRJ	BRAZIL: São Paulo — Piraju
1 male – 1 female	SEMC	BRAZIL: Santa Catarina — Nova Teutônia
1 male – 1 female	SEMC	BRAZIL: Santa Catarina — Nova Teutônia
Belostoma candidulum Montandon, 1903 (v1)
1 female	MNRJ 169	BRAZIL: Minas Gerais — Barra de Paraopeba
Belostoma horvathi Montandon, 1903
1 male	MNRJ	BRAZIL: Amapá — Serra do Navio
1 female	MNRJ 160	BRAZIL: Goiás — Rio Verde
1 female	MNRJ 162	BRAZIL: Goiás — Rio Verde
1 female	MNRJ 163	BRAZIL: Minas Gerais — Barra de Paraopeba
1 female	DZRJ 375	BRAZIL: Minas Gerais — Manga
1 male	DPIC	BRAZIL: Minas Gerais — Itajubá, Delfim Moreira, Bacia do Rio Grande, Riacho Santo Antônio
1 male	DPIC 1641	BRAZIL: Minas Gerais — Lagoa Santa
1 female	DPIC 657	BRAZIL: Minas Gerais — Ouro Branco
1 male – 1 female	DPIC 1218	BRAZIL: Minas Gerais — Viçosa, Campus da UFV
1 male	DZRJ 18	BRAZIL: Rio de Janeiro — Maricá, Restinga de Maricá
1 male	DZRJ 78	BRAZIL: Rio de Janeiro — Maricá, Restinga de Maricá
1 male	DZRJ 308	BRAZIL: Rio de Janeiro — Maricá, Restinga de Maricá
5 males – 1 female	DZRJ 360	BRAZIL: Rio de Janeiro — Maricá, Restinga de Maricá
1 male	SEMC 1063	BRAZIL: São Paulo — Araçá [= Araçaíba]
1 female	SEMC 229	BRAZIL: São Paulo — Itatiba
Belostoma oxyurum (Dufour, 1863) (v1)
1 male – 1 female	MNRJ	BRAZIL: Paraná — Bituruna
1 female	MNRJ 124	BRAZIL: Paraná — Bituruna
1 male – 1 female	MNRJ 127	BRAZIL: Paraná — Bituruna
2 males	MNRJ 128	ARGENTINA: Buenos Aires — Chascomús
2 males	MACN 39347	ARGENTINA: Buenos Aires — Chascomús
1 female	MACN 49957	ARGENTINA: Buenos Aires — Chascomús
Belostoma oxyurum (Dufour, 1863) (v2)
1 male	MNRJ 123	BRAZIL: Paraná — Bituruna
Belostoma sanctulum Montandon, 1903 (v1)
1 female	MNRJ 172	BRAZIL: Minas Gerais — Barra de Paraopeba
1 male	HNHM	BRAZIL: Espírito Santo
1 male	ISNB	BRAZIL: Espírito Santo
1 female	DZRJ 367	BRAZIL: Rio de Janeiro — Maricá
1 female	DZRJ 503	BRAZIL: Rio de Janeiro — Restinga de Maricá
2 males	DEES	BRAZIL: São Paulo — Piracicaba
Belostoma sanctulum Montandon, 1903 (v2)
1 male	ISNB	BRAZIL: Espírito Santo
1 male	DZRJ 78	BRAZIL: Rio de Janeiro — Maricá, Restinga de Maricá
1 female	DZRJ 17	BRAZIL: Rio de Janeiro — Teresópolis, Serra do Subaio
Belostoma minor group sensu Lauck (outgroups)
Belostoma minor (Palisot de Beauvois, 1805) (v1)
1 male – 1 female	AMNH 3330	CUBA: Pinar del Rio — Cabañas
Belostoma minor (Palisot de Beauvois, 1805) (v2)
1 female	AMNH 3333	CUBA: Pinar del Rio — Cabañas
Belostoma denticolle group sensu Lauck (outgroups)
Belostoma amazonum Estévez & Polhemus, 2001 (v1)
4 males – 2 females	SEMC	BRAZIL: Pará
1 male	SEMC 6480	BRAZIL: Pará
1 male	SEMC	BRAZIL: Pará
1 female	SEMC	BRAZIL: Pará
1 male	INPA 0021040	BRAZIL: Amazonas — Manaus, Estrada AM-010 km 64
1 female	INPA 0020887	BRAZIL: Amazonas — “Amazonasgebiet”, Rio Tapajós, Lago Jyncanga
1 male	INPA 0020952	BRAZIL: Amazonas — BR-174 km 45
Belostoma amazonum Estévez & Polhemus, 2001 (v2)
1 female	INPA 0020914	BRAZIL: Amazonas — Lago Janauacá [as Lago do Janauacá]
Belostoma denticolle Montandon, 1903 (v1)
1 male	INPA 0021017	BRAZIL: Roraima — Caracaraí
1 female	MNRJ	BRAZIL: Amapá — Porto Santana [1000 m asl]
1 female	AMNH	BRAZIL: Pará — Jacareacanga
2 males	DZRJ 969	BRAZIL: Amazonas — Rio Solimões, Ilha da Marchantaria, Lago Janauarí
1 male	INPA 0020957	BRAZIL: Amazonas — near to Rio Preto da Eva, Rodovia AM-010 km 95
1 male	AMNH	BRAZIL: Mato Grosso — Porto Velho, Santa Terezinha, Rio Tapirapé
1 male	DPIC 198	BRAZIL: Minas Gerais — Conselheiro Lafaiete, Gagé
Belostoma denticolle Montandon, 1903 (v2)
2 male – 1 female	DZRJ 969	BRAZIL: Amazonas — Rio Solimões, Ilha da Marchantaria, Lago Janauarí
1 male	DZRJ	BRAZIL: Bahia — Caetité
Belostoma denticolle Montandon, 1903 (v3)
1 male	INPA 0020937	BRAZIL: Amazonas — Manaus, Estrada AM-010 km 45
1 male – 1 female	DZRJ 969	BRAZIL: Amazonas — Rio Solimões, Ilha da Marchantaria, Lago Janauarí
The origin (country and region) and depository are provided for each species. Full official names of the subdivision are presented in italic. All acronyms of depositories are based on Arnett-Jr. et al. (1993), except DZRJ and MNRJ. Specimens with intraspecific variations were treated as terminal taxa — receiving the letter “v” followed by a number.
aList of specimen depositories is based on Arnett-Jr et al. (1993), except for DZRJ, LEBIP, and MNRJ. DZRJ, Departamento de Zoologia, Instituto de Biologia, Universidade Federal do Rio de Janeiro, Rio de Janeiro, Brazil; LEBIP, Laboratório de Estudos da Biodiversidade do Pampa, São Gabriel, Universidade Federal do Pampa, Rio Grande do Sul, Brazil; MNRJ, Museu Nacional, Universidade Federal do Rio…
*Holotype.
**Paratype.

## Sheet: Planilha3
Table S3. Mean values of measurements (in mm) and relations used as such (continuous dataset).
	Character (#)
Taxon	1	2	3	4	6	7	30
	TBL	T/G	R1/R2	A/I	IW/A	IW/O	W/L
Belostoma candidulum (v1) (OU)	17.6	2.25	1	0.94	1.58	1.69	1
Belostoma candidulum (v2) (OU)	15.8	1.93	1	0.88	1.6	1.71	1
Belostoma horvathi (OU)	17.1	2.22	0.9	0.93	1.59	1.51	1.1
Belostoma oxyurum (v1) (OU)	16.7	2.12	0.89	0.95	1.85	1.94	1
Belostoma oxyurum (v2) (OU)	17.7	2.05	0.92	0.87	2	1.86	1
Belostoma sanctulum (v1) (OU)	16.5	2.21	0.92	1	1.6	1.79	1
Belostoma sanctulum (v2) (OU)	17	2.19	0.92	0.98	1.67	1.72	1
Belostoma amazonum (v1) (OU)	13.4	2.26	0.85	0.94	1.72	1.66	1.4
Belostoma amazonum (v2) (OU)	13.1	2.15	0.87	0.97	1.66	1.71	1.5
Belostoma denticolle (v1) (OU)	15	2.3	0.89	0.99	1.51	1.51	1
Belostoma denticolle (v2) (OU)	15.6	2.44	0.92	0.84	1.84	1.6	1
Belostoma denticolle (v3) (OU)	14.8	2.3	0.88	0.95	1.68	1.58	1
Belostoma minor (v1) (OU)	17.3	2.01	1	1.11	1.55	1.83	0.8
Belostoma minor (v2) (OU)	17.5	2.19	1	1.25	1.43	1.67	0.8
Belostoma estevezae (IN)	11.6	2.12	0.89	0.89	1.9	1.92	1
Belostoma lariversi (v1) (IN)	14.4	2.19	0.9	0.95	1.75	1.83	3.75
Belostoma lariversi (v2) (IN)	15.3	2.26	0.91	0.9	1.71	1.78	3.75
Belostoma lanemeloi sp. nov. (IN)	14.1	2.28	0.82	0.92	1.88	1.94	1
Belostoma micantulum (v1) (IN)	12.3	2.07	0.86	0.93	1.91	1.85	1
Belostoma micantulum (v2) (IN)	12.3	1.97	0.8	0.96	1.91	1.91	1
Belostoma minusculum (v1) (IN)	11.8	2.16	0.93	0.95	1.83	1.69	1
Belostoma minusculum (v2) (IN)	11.7	2.17	0.95	0.93	1.89	1.84	1
Belostoma nessimiani (IN)	11.4	2.07	0.88	0.9	1.98	1.55	1
Belostoma nicaeum (v1) (IN)	11.9	2.13	0.89	0.87	1.94	1.85	2.5
Belostoma nicaeum (v2) (IN)	12.8	2.06	0.88	0.93	1.96	1.96	2.5
Belostoma nieseri sp. nov. (IN)	13.5	2.1	0.82	0.95	1.92	1.82	0.67
Belostoma parvum (IN)	10.9	1.99	0.81	0.95	1.81	1.85	1.5
Belostoma plebejum (IN)	14.7	2.1	0.83	0.89	1.94	1.78	1.5
Belostoma pygmeum (v1) (IN)	11.1	2.19	0.94	0.95	1.81	1.7	2
Belostoma pygmeum (v2) (IN)	11.5	2.11	0.88	0.89	1.84	1.85	2
Horizontal lines among terminal taxa separate species groups (in order, from top to bottom, Belostoma oxyurum group, B. denticolle group, B. minor group, and B. plebejum group). Abbreviations: TBL, total body length (from the apex of head to the end of abdomen); T/G, ratio between total body length and the greatest width of body; R1/R2, ratio between the lengths of first and second visible segmen…

## Sheet: Planilha4
Table S4. Distribution of discrete character states (42 characters) among terminal taxa.
	Character (#)
Taxon	1 2 3 4
	589012345678901234567891234567890123456789
Belostoma candidulum (v1) (OU)	1000000-----001010000000000-01000--0010000
Belostoma candidulum (v2) (OU)	10000?0-----001010000000000-01000--0010000
Belostoma horvathi (OU)	0000010-----001010000000000-00111--1010000
Belostoma oxyurum (v1) (OU)	2001---0100-00110-000100021-03111--102100-
Belostoma oxyurum (v2) (OU)	2001---0100-00110-000100021-03111--102100-
Belostoma sanctulum (v1) (OU)	2000121-----110110001000000-02110--0010000
Belostoma sanctulum (v2) (OU)	2000100-----11010-00100???????????????????
Belostoma amazonum (v1) (OU)	1000101-----001110110010001-12000--1010000
Belostoma amazonum (v2) (OU)	1000121-----001110110010001-12000--1010000
Belostoma denticolle (v1) (OU)	0000020-----000111100010001-00100--0010000
Belostoma denticolle (v2) (OU)	0000020-----000111100010001-00100--0010000
Belostoma denticolle (v3) (OU)	0000001-----000111100010001-00100--0010000
Belostoma minor (v1) (OU)	0101---0000-00000-001100022-13120--1020000
Belostoma minor (v2) (OU)	0101---0012-00000-001100022-13120--1020000
Belostoma estevezae (IN)	1011---1011002010100002101-1-----031220101
Belostoma lanemeloi sp. nov. (IN)	1011---0001102120-01102101-0-----031220101
Belostoma lariversi (v1) (IN)	1011---0111002101000102111-1------32220011
Belostoma lariversi (v2) (IN)	1011---1012-02101010102111-1------32220011
Belostoma micantulum (v1) (IN)	1011---0001002010-11102101-1-----011220001
Belostoma micantulum (v2) (IN)	1011---0011002010-11102100-1-----031220001
Belostoma minusculum (v1) (IN)	2011---0001002020-10102101-1-----020100001
Belostoma minusculum (v2) (IN)	2011---0000-02020-10002101-1-----031100001
Belostoma nessimiani (IN)	1011---0001102111111102100-0-----121120001
Belostoma nieseri sp. nov. (IN)	2011---0011102011011002101-0-----131220001
Belostoma nicaeum (v1) (IN)	1011---1012-02020-00002110-1------32200010
Belostoma nicaeum (v2) (IN)	1011---1011002020-00002110-1------32200010
Belostoma parvum (IN)	1011---0001102011110102100-1-----021120001
Belostoma plebejum (IN)	2011---1011002110-01102100-1-----001100001
Belostoma pygmeum (v1) (IN)	1011---0012-02021111002111-1------3220101-
Belostoma pygmeum (v2) (IN)	1011---0011002021111102111-1------3220101-
Horizontal lines among terminal taxa separate species groups (in order, from top to bottom, Belostoma oxyurum group, B. denticolle group, B. minor group, and B. plebejum group). The continuous characters 1, 2, 3, 4, 6, 7, and 30 were not included. ?, not available information; -, inapplicable data; v1, v2, and v3, taxa with intraspecific variation; OU, outgroup; IN, ingroup.

## Sheet: Planilha5
Table S5. Kref and fit (adjusted homoplasy) of the trees under IW (analysis three).
K value	distref	Kref	Length	Trees	Fit (adjusted homoplasy)
k0*	50	1.241	132	1	17.158
k1*	51.667	1.327	132	1	16.757
k2*	53.333	1.419	132	1	16.351
k3*	55	1.517	132	1	15.94
k4*	56.667	1.623	132	1	15.523
k5*	58.333	1.738	132	1	15.1
k6*	60	1.862	132	1	14.671
k7*	61.667	1.997	132	1	14.235
k8*	63.333	2.144	132	1	13.791
k9*	65	2.305	132	1	13.339
k10*	66.667	2.483	132	1	12.879
k11*	68.333	2.679	132	1	12.409
k12*	70	2.897	132	1	11.929
k13*	71.667	3.14	132	1	11.439
k14*	73.333	3.414	132	1	10.937
k15*	75	3.724	132	1	10.422
k16	76.667	4.079	130	1	9.881
k17	78.333	4.488	130	1	9.322
k18	80	4.966	130	1	8.748
k19	81.667	5.53	130	1	8.16
k20	83.333	6.207	130	1	7.554
k21	85	7.034	130	1	6.929
k22	86.667	8.069	130	1	6.283
k23	88.333	9.399	130	1	5.615
k24	90	11.172	130	1	4.92
*K-values that recovered strict consensus trees with the lowest SPR distance values.

## Sheet: Planilha6
Table S6. Kref and fit (adjusted homoplasy) of the trees under IW (analysis six).
K value	distref	Kref	Length	Trees	Fit (adjusted homoplasy)
k0	50	1.263	142.989	1	19.92
k1	51.667	1.35	142.989	1	19.41
k2	53.333	1.443	142.989	1	18.896
k3	55	1.544	142.989	1	18.379
k4	56.667	1.651	142.989	1	17.857
k5	58.333	1.768	142.989	1	17.331
k6	60	1.894	142.693	1	16.799
k7	61.667	2.032	142.693	1	16.26
k8	63.333	2.181	142.693	1	15.716
k9	65	2.345	142.693	1	15.165
k10*	66.667	2.526	142.264	1	14.605
k11*	68.333	2.725	142.264	1	14.037
k12*	70	2.947	142.264	1	13.461
k13*	71.667	3.194	142.264	1	12.874
k14	73.333	3.473	142.088	1	12.274
k15	75	3.789	142.088	1	11.66
k16	76.667	4.149	140.275	1	11.033
k17	78.333	4.566	140.275	1	10.383
k18	80	5.051	140.275	1	9.72
k19	81.667	5.625	140.275	1	9.042
k20	83.333	6.314	140.275	1	8.349
k21	85	7.156	140.275	1	7.638
k22	86.667	8.209	140.275	1	6.907
k23	88.333	9.562	140.275	1	6.154
k24	90	11.366	140.275	1	5.378
*K-values that recovered strict consensus trees with the lowest SPR distance values.

## Sheet: Planilha7
Table S7. Estimated marginal likelihoods for different models for the morphological dataset of the Belostoma plebejum phylogeny.
	Marginal lnL estimates
	Stepping-stone	Path sampling	Ln Bayes factor
Substitution Model
Model 1: Mk model (naïve model)	-694.6	-682.688	150.929
*Model 2: Mk + G4 + p_symm + informative	-543.6715*	-543.9179*	-
Model 3: Mk + G4 + p_asymm + informative	-551.398	-550.902	7.7261
Marginal likelihoods were estimated using both the stepping-stone (Xie et al. 2011) and path sampling estimators (Lartillot 2006).
*According to ln-Bayes factor (lnBF), computing the marginal likelihoods under stepping-stone-sampling, this is the preferred model according to the scale outlined by Jeffreys (1961).

## Sheet: Planilha8
Table S8. Summary of 127 different combinations of continuous characters (from one-to-one combinations to seven-to-seven combinations).
Combination	Character	SPR distance
	1	0
	2	0
	3	0
	4	0
	6	0
	7	0
	30	2
	1-2	0
	1-3	0
	1-4	0
	1-6	0
	1-7	0
	1-30	2
	2-3	0
	2-4	0
	2-6	0
	2-7	0
	2-30	2
	3-4	0
	3-6	0
	3-7	0
	3-30	0
	4-6	0
	4-7	0
	4-30	2
	6-7	0
	6-30	2
	7-30	2
	1-2-3	0
	1-2-4	0
	1-2-6	0
	1-2-7	6
	1-2-30	2
	1-3-4	0
	1-3-6	0
	1-3-7	0
	1-3-30	0
	1-4-6	0
	1-4-7	0
	1-4-30	2
	1-6-7	0
	1-6-30	2
	1-7-30	2
	2-3-4	0
	2-3-6	0
	2-3-7	0
	2-3-30	0
	2-4-6	0
	2-4-7	0
	2-4-30	2
	2-6-7	0
	2-6-30	0
	2-7-30	2
	3-4-6	0
	3-4-7	0
	3-4-30	2
	3-6-7	0
	3-6-30	0
	3-7-30	0
	4-6-7	0
	4-6-30	2
	4-7-30	2
	6-7-30	0
	1-2-3-4	0
	1-2-3-6	0
	1-2-3-7	6
	1-2-3-30	0
	1-2-4-6	0
	1-2-4-7	6
	1-2-4-30	2
	1-2-6-30	0
	1-2-6-30	0
	1-2-7-30	2
	1-3-4-6	0
	1-3-4-7	0
	1-3-4-30	2
	1-3-6-7	0
	1-3-6-30	0
	1-3-7-30	0
	1-4-6-7	0
	1-4-6-30	2
	1-4-7-30	2
	1-6-7-30	0
	2-3-4-6	0
	2-3-4-7	0
	2-3-4-30	2
	2-3-6-30	0
	2-3-6-30	0
	2-3-7-30	0
	2-4-6-30	0
	2-4-6-30	2
	2-4-7-30	2
	2-6-7-30	0
	3-4-6-30	0
	3-4-6-30	2
	3-4-7-30	2
	3-6-7-30	0
	4-6-7-30	2
	1-2-3-4-6	0
	1-2-3-4-7	0
	1-2-3-4-30	2
	1-2-3-6-7	0
	1-2-3-6-30	0
	1-2-3-7-30	6
	1-2-4-6-7	0
	1-2-4-6-30	2
	1-2-4-7-30	2
	1-2-6-7-30	0
	1-3-4-6-7	0
	1-3-4-6-30	2
	1-3-4-7-30	2
	1-3-6-7-30	0
	1-4-6-7-30	2
	2-3-4-6-7	0
	2-3-4-6-30	0
	2-3-4-7-30	2
	2-3-6-7-30	0
	2-4-6-7-30	2
	3-4-6-7-30	0
	1-2-3-4-6-7	0
	1-2-3-4-6-30	0
	1-2-3-4-7-30	2
	1-2-3-6-7-30	0
	1-2-4-6-7-30	2
	1-3-4-6-7-30	0
	2-3-4-6-7-30	0
	1-2-3-4-6-7-30	0
Of these, 87 combinations together with the discrete character partition recovered only strict-consensus topologies with SPR distance equals to zero, when compared to the strict-consensus topology estimated only with the partition comprising discrete characters. Thirty-six combinations instead recovered strict-consensus topologies with SPR distance equals to two, and only four combinations recove…

## Sheet: Planilha9
Table S9. Similarity of the trees as measured using Robinson-Foulds absolute symmetric distance.
	Maximum Parsimony									Model-based methods
	Discrete only			Discrete + continuous			Discrete + combination of continuous			Discrete only	Discrete only	Discrete + continuous
	A1	A2	A3	A4	A5	A6	SPR0	SPR2	SPR6	ML	BI	BI
A1	0
A2	8	0
A3	8	4	0
A4	8	6	10	0
A5	8	0	4	6	0
A6	8	4	0	10	4	0
SPR0	8	4	0	10	4	0	0
SPR2	9	13	9	13	13	9	9	0
SPR6	8	4	0	10	4	0	0	9	0
ML	12	14	16	16	14	16	16	17	16	0
BI	10	14	16	14	14	16	16	15	16	12	0
BI	10	12	14	14	12	14	14	15	14	10	6	0
A1, maximum parsimony analysis considering only the discrete characters, which were assigned equal weights; A2, maximum parsimony analysis considering only the discrete characters, which were submitted to an implicit weighting (IW) scheme with constant K equals to six; A3, maximum parsimony analysis considering only the discrete characters, which were submitted to IW, but with a constant K estima…

## Sheet: Planilha10
Table S10. Estimated marginal likelihoods for different combinations of continuous character evolution.
	Marginal lnL estimates
	Stepping-stone	Path sampling	Ln Bayes factor
Model
Yule (pure birth process) + homogeneous BM	-383.236	-383.668	5.2053
Birth-death process + homogeneous BM	-384.461	-385.507	6.4303
Yule (pure birth process) + relaxed BM	-381.324	-383.237	3.2933
Birth-death process + relaxed BM	-380.867	-382.612	2.8366
Yule (pure birth process) + homogeneous OU	-378.0305*	-377.4930*	-
Birth-death process + homogeneous OU	-378.37	-378.736	0.3394
Marginal likelihoods were estimated using both the stepping-stone (Xie et al. 2011) and path sampling estimators (Lartillot 2006). Abbreviations: BM, Brownian motion process; OU, Ornstein–Uhlenbeck model.
*According to ln-Bayes factor (lnBF), computing the marginal likelihoods under stepping-stone-sampling, this is the preferred model. However, such a model is barely worth mentioning (when compared to the Birth-death process + homogeneous OU model) according to the scale outlined by Jeffreys (1961).
